# Supplementary material
Source: Springer Nature journal article supplement (https://www.springermedizin.de/resource/supplementary/12958_2011_957_MOESM1_ESM.pdf/9566446)
Supplement: MOESM1 [file 9566446]

ENVIRONMENTAL  
STRESS

Limited resources  
Extreme temperature  
Water deprivation  
Antagonistic species

altered  
gene expression

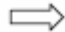

INDUCED / ACCELERATED  
RESPONSE

Nutrient storage  
Temperature control  
Volume control  
Fight/flight conduct

natural  
selection

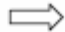

SEXUAL  
DIMORPHISM  
established  
anatomical  
& physiological  
adaptations
